# Supplementary material
Source: PubMed Central journal article supplement (PMC8103894)
Supplement: NIHMS1681665-supplement-1681665_Report_Summary.pdf [file NIHMS1681665-supplement-1681665_Report_Summary.pdf]

## Reporting Summary

Nature Research wishes to improve the reproducibility of the work that we publish. This form provides structure for consistency and transparency in reporting. For further information on Nature Research policies, see [Authors & Referees](#) and the [Editorial Policy Checklist](#).

### Statistics

For all statistical analyses, confirm that the following items are present in the figure legend, table legend, main text, or Methods section.

n/a Confirmed

- |                                     |                                     |                                                                                                                                                                                                                                                            |
|-------------------------------------|-------------------------------------|------------------------------------------------------------------------------------------------------------------------------------------------------------------------------------------------------------------------------------------------------------|
| <input type="checkbox"/>            | <input checked="" type="checkbox"/> | The exact sample size ( $n$ ) for each experimental group/condition, given as a discrete number and unit of measurement                                                                                                                                    |
| <input type="checkbox"/>            | <input checked="" type="checkbox"/> | A statement on whether measurements were taken from distinct samples or whether the same sample was measured repeatedly                                                                                                                                    |
| <input type="checkbox"/>            | <input checked="" type="checkbox"/> | The statistical test(s) used AND whether they are one- or two-sided<br><i>Only common tests should be described solely by name; describe more complex techniques in the Methods section.</i>                                                               |
| <input checked="" type="checkbox"/> | <input type="checkbox"/>            | A description of all covariates tested                                                                                                                                                                                                                     |
| <input checked="" type="checkbox"/> | <input type="checkbox"/>            | A description of any assumptions or corrections, such as tests of normality and adjustment for multiple comparisons                                                                                                                                        |
| <input type="checkbox"/>            | <input checked="" type="checkbox"/> | A full description of the statistical parameters including central tendency (e.g. means) or other basic estimates (e.g. regression coefficient) AND variation (e.g. standard deviation) or associated estimates of uncertainty (e.g. confidence intervals) |
| <input type="checkbox"/>            | <input checked="" type="checkbox"/> | For null hypothesis testing, the test statistic (e.g. $F$ , $t$ , $r$ ) with confidence intervals, effect sizes, degrees of freedom and $P$ value noted<br><i>Give <math>P</math> values as exact values whenever suitable.</i>                            |
| <input checked="" type="checkbox"/> | <input type="checkbox"/>            | For Bayesian analysis, information on the choice of priors and Markov chain Monte Carlo settings                                                                                                                                                           |
| <input checked="" type="checkbox"/> | <input type="checkbox"/>            | For hierarchical and complex designs, identification of the appropriate level for tests and full reporting of outcomes                                                                                                                                     |
| <input checked="" type="checkbox"/> | <input type="checkbox"/>            | Estimates of effect sizes (e.g. Cohen's $d$ , Pearson's $r$ ), indicating how they were calculated                                                                                                                                                         |

*Our web collection on [statistics for biologists](#) contains articles on many of the points above.*

### Software and code

Policy information about [availability of computer code](#)

Data collection

Data analysis

For manuscripts utilizing custom algorithms or software that are central to the research but not yet described in published literature, software must be made available to editors/reviewers. We strongly encourage code deposition in a community repository (e.g. GitHub). See the Nature Research [guidelines for submitting code & software](#) for further information.

### Data

Policy information about [availability of data](#)

All manuscripts must include a [data availability statement](#). This statement should provide the following information, where applicable:

- Accession codes, unique identifiers, or web links for publicly available datasets
- A list of figures that have associated raw data
- A description of any restrictions on data availability

## Field-specific reporting

Please select the one below that is the best fit for your research. If you are not sure, read the appropriate sections before making your selection.

- Life sciences       Behavioural & social sciences       Ecological, evolutionary & environmental sciences

For a reference copy of the document with all sections, see [nature.com/documents/nr-reporting-summary-flat.pdf](https://www.nature.com/documents/nr-reporting-summary-flat.pdf)

## Life sciences study design

All studies must disclose on these points even when the disclosure is negative.

|                 |                                                                                                                                                                                                                                                                                                |
|-----------------|------------------------------------------------------------------------------------------------------------------------------------------------------------------------------------------------------------------------------------------------------------------------------------------------|
| Sample size     | The number of experiments and replicates was based on standard practices. In general, two or three independent experiments were conducted with three biological replicates or technical replicates where applicable. Details for each experiment are included in the respective figure legend. |
| Data exclusions | n/a                                                                                                                                                                                                                                                                                            |
| Replication     | The experimental findings were reliably reproduced. See details in respective figure legends.                                                                                                                                                                                                  |
| Randomization   | n/a                                                                                                                                                                                                                                                                                            |
| Blinding        | n/a                                                                                                                                                                                                                                                                                            |

## Reporting for specific materials, systems and methods

We require information from authors about some types of materials, experimental systems and methods used in many studies. Here, indicate whether each material, system or method listed is relevant to your study. If you are not sure if a list item applies to your research, read the appropriate section before selecting a response.

### Materials & experimental systems

| n/a                                 | Included in the study                                     |
|-------------------------------------|-----------------------------------------------------------|
| <input type="checkbox"/>            | <input checked="" type="checkbox"/> Antibodies            |
| <input type="checkbox"/>            | <input checked="" type="checkbox"/> Eukaryotic cell lines |
| <input checked="" type="checkbox"/> | <input type="checkbox"/> Palaeontology                    |
| <input checked="" type="checkbox"/> | <input type="checkbox"/> Animals and other organisms      |
| <input checked="" type="checkbox"/> | <input type="checkbox"/> Human research participants      |
| <input checked="" type="checkbox"/> | <input type="checkbox"/> Clinical data                    |

### Methods

| n/a                                 | Included in the study                              |
|-------------------------------------|----------------------------------------------------|
| <input checked="" type="checkbox"/> | <input type="checkbox"/> ChIP-seq                  |
| <input type="checkbox"/>            | <input checked="" type="checkbox"/> Flow cytometry |
| <input checked="" type="checkbox"/> | <input type="checkbox"/> MRI-based neuroimaging    |

## Antibodies

|                 |                                                                                                                                                                                                                                                                                                                                                                                                                                                                                                                             |
|-----------------|-----------------------------------------------------------------------------------------------------------------------------------------------------------------------------------------------------------------------------------------------------------------------------------------------------------------------------------------------------------------------------------------------------------------------------------------------------------------------------------------------------------------------------|
| Antibodies used | Details about all antibodies used in our study are described in the Methods section of the manuscript including vendor name, Cat# and clone.                                                                                                                                                                                                                                                                                                                                                                                |
| Validation      | All antibodies, except the anti-phospho-MDA5 (Ser88) and anti-MDA5 antibodies, were purchased from commercial vendors who have validated the antibodies for the use of Western blot, Co-immunoprecipitation, and/or FACS analysis. The anti-phospho-MDA5 (Ser88) antibody was previously validated by the Gack laboratory and has been published (Wies et al., Immunity 2013). The anti-MDA5 antibodies were provided by Dr. Jan Rehwinkel (Oxford University) and has been published (Hertzog et al., Eur J Immunol 2018). |

## Eukaryotic cell lines

Policy information about [cell lines](#)

|                                                                   |                                                                                                                                                                                                                                                                                                                                                                                                                                                                                        |
|-------------------------------------------------------------------|----------------------------------------------------------------------------------------------------------------------------------------------------------------------------------------------------------------------------------------------------------------------------------------------------------------------------------------------------------------------------------------------------------------------------------------------------------------------------------------|
| Cell line source(s)                                               | NHLF (Lonza), HEK293T (ATCC), Vero (ATCC), BHK-21 (ATCC), Aedes albopictus clone C6/36 (ATCC), HAP-1 WT and ISG15 KO cells (Horizon Discovery). Human PBMCs were isolated from unidentified healthy donor peripheral blood (HemaCare). The WT and Isg15 -/- MEF, WT and ISG15 KO HeLa, SVGA, MDA5 KO HEK293, RIG-I KO HEK293, HEK293T-hACE2, Vero-hACE2, and A549-hACE2 cells were obtained from other investigators (details are described in the Methods section of our manuscript). |
| Authentication                                                    | Cell lines from ATCC, Lonza, and Horizon Discovery were authenticated by the vendors and were not further authenticated in our laboratory. Cell lines that were obtained and validated by other groups were not further authenticated. All ISG15 KO or MDA5 KO cell lines were validated by confirming the absence of ISG15 or MDA5 protein expression by immunoblotting.                                                                                                              |
| Mycoplasma contamination                                          | Cell lines have been regularly tested for potential mycoplasma contamination by PCR and/or using the MycoAlert Kit (Lonza).                                                                                                                                                                                                                                                                                                                                                            |
| Commonly misidentified lines (See <a href="#">ICLAC</a> register) | n/a                                                                                                                                                                                                                                                                                                                                                                                                                                                                                    |

## Flow Cytometry

### Plots

Confirm that:

- The axis labels state the marker and fluorochrome used (e.g. CD4-FITC).
- The axis scales are clearly visible. Include numbers along axes only for bottom left plot of group (a 'group' is an analysis of identical markers).
- All plots are contour plots with outliers or pseudocolor plots.
- A numerical value for number of cells or percentage (with statistics) is provided.

### Methodology

Sample preparation

Cells were harvested and then pelleted by centrifugation at 300 x g for 5 min. Cells were washed with PBS and fixed with 4% (v/v) formaldehyde in PBS at room temperature for 30 min, followed by washing cells twice with PBS. For antibody staining, cells were incubated with 1x BD Perm/Wash buffer (BD Biosciences), followed by staining with primary (anti-flavivirus E [4G2] ; 1:100) and secondary (goat anti-mouse Alexa 488; 1:500) antibody at 4 degree in 1x BD Perm/Wash buffer for 30 min each.

Instrument

LSR Fortessa flow cytometer (BD Biosciences)

Software

FACS Diva (BD Biosciences), FlowJo (Tree Star)

Cell population abundance

n/a

Gating strategy

The main cell population was gated in the FCS/SSC blot and then analyzed in the Alexa 488 channel. Positive cells were above cutoff value, which is set to 98% of measure events of the negative control.

Tick this box to confirm that a figure exemplifying the gating strategy is provided in the Supplementary Information.
