# Supplementary material
Source: PubMed Central journal article supplement (PMC8103894)

**Extended Data Fig. 2a:**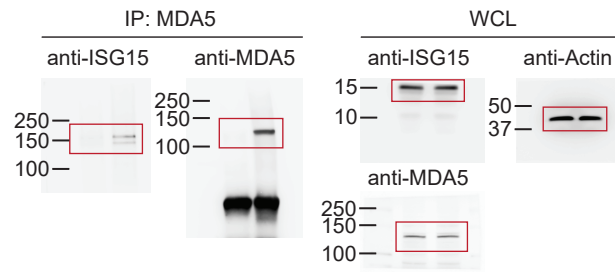**Extended Data Fig. 2d:**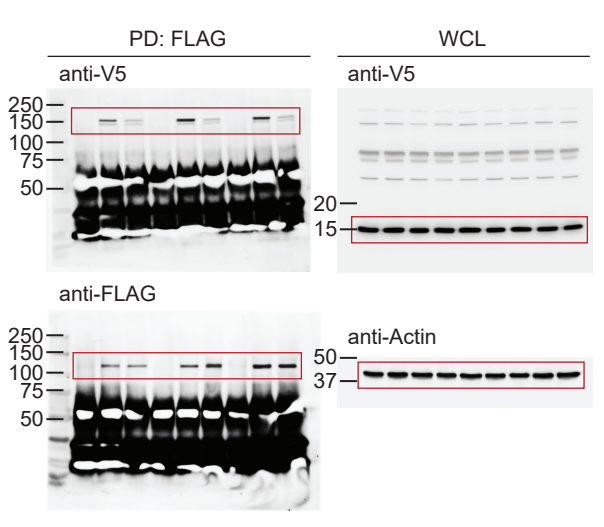**Extended Data Fig. 2c:**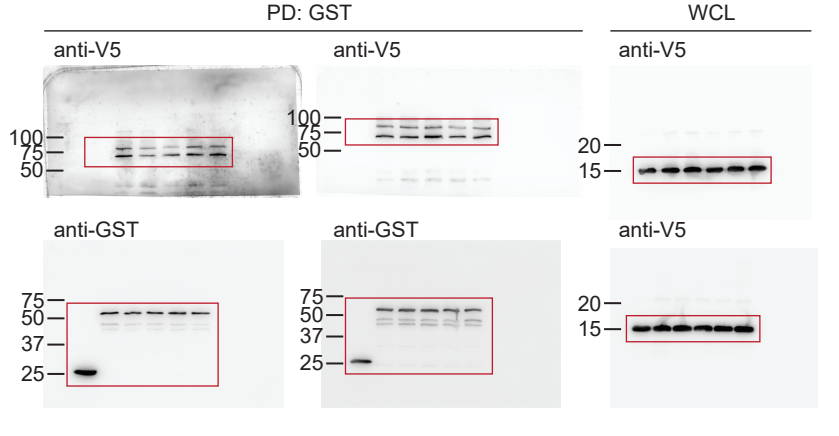**Extended Data Fig. 2i:**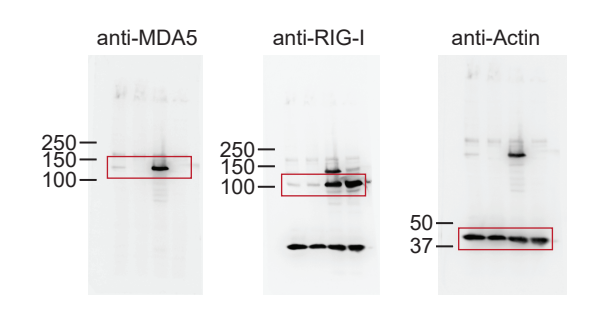**Extended Data Fig. 2e:**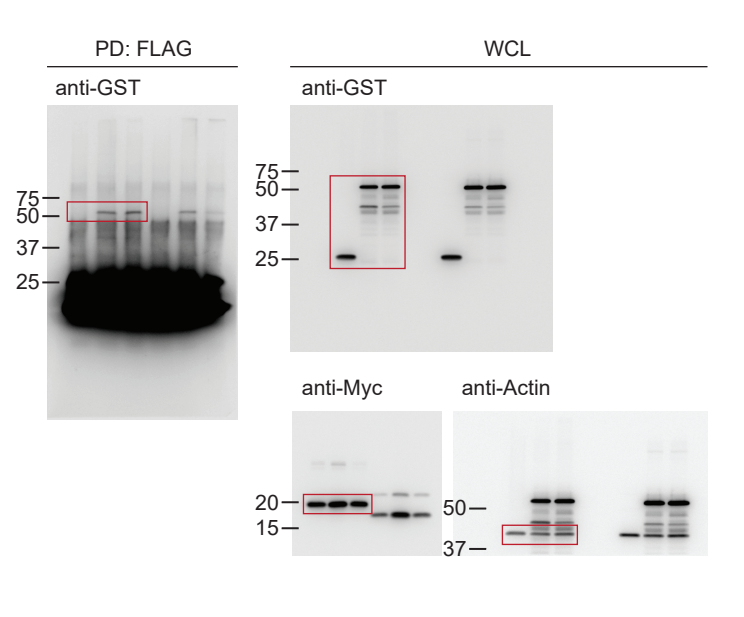**Extended Data Fig. 2f:**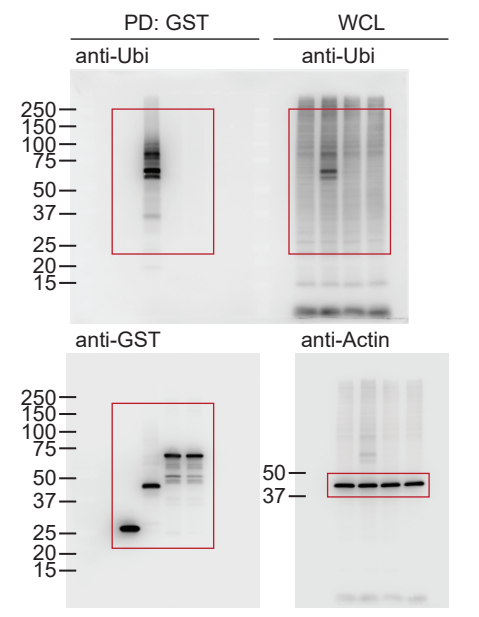**Extended Data Fig. 2h:**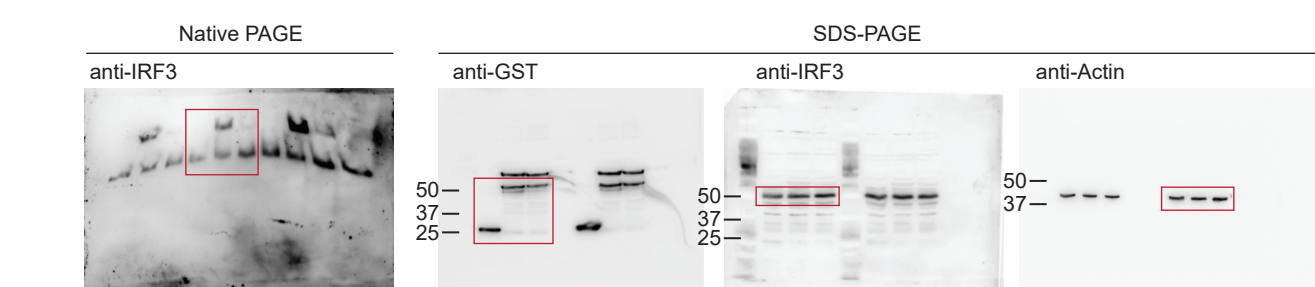

Supplement: NIHMS1681665-supplement-1681665_SourceData_ExtData_Fig2_Blot.pdf [file NIHMS1681665-supplement-1681665_SourceData_ExtData_Fig2_Blot.pdf]
