# Supplementary material
Source: PubMed Central journal article supplement (PMC8103894)

Extended Data Fig. 3a:

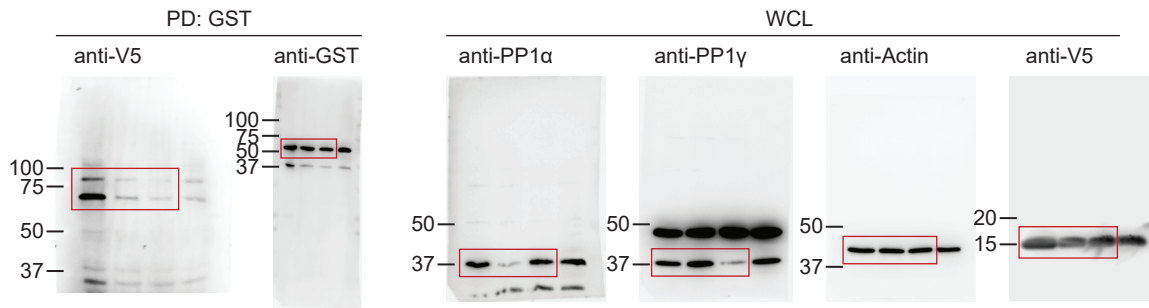

Extended Data Fig. 3b:

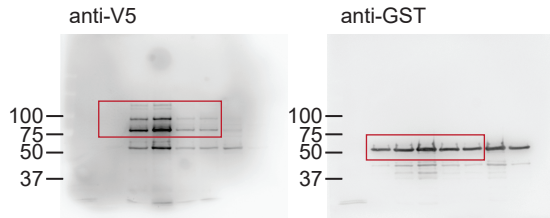

Extended Data Fig. 3c:

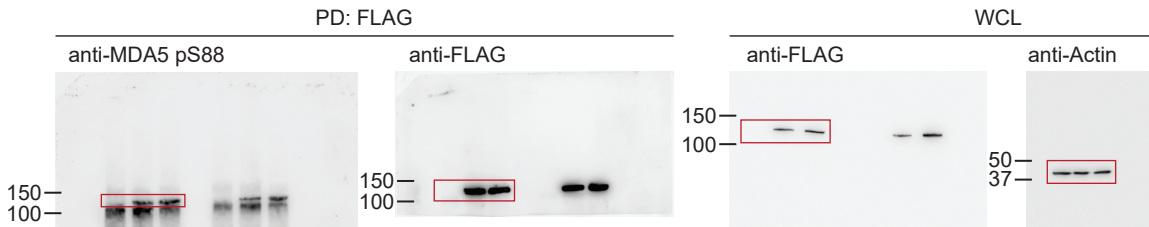

Extended Data Fig. 3d:

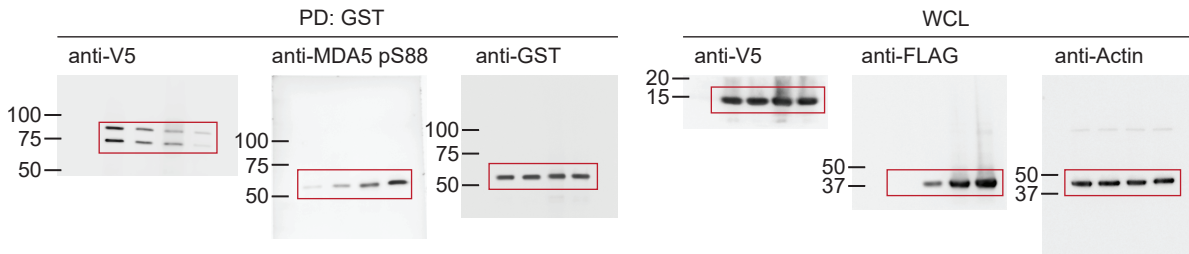

Extended Data Fig. 3e:

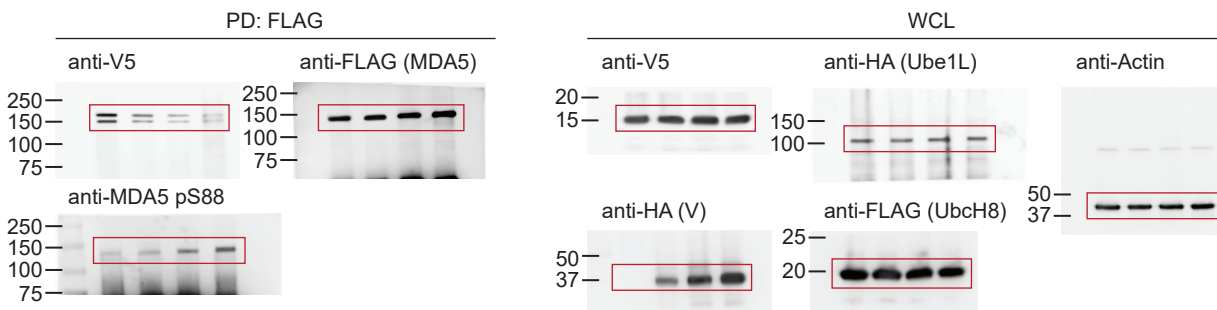

Extended Data Fig. 3f:

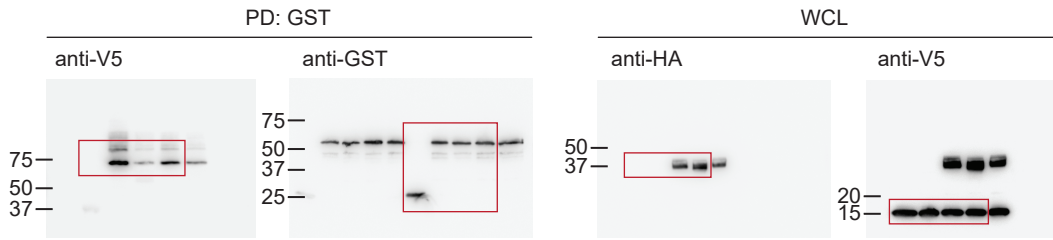

Extended Data Fig. 3g:

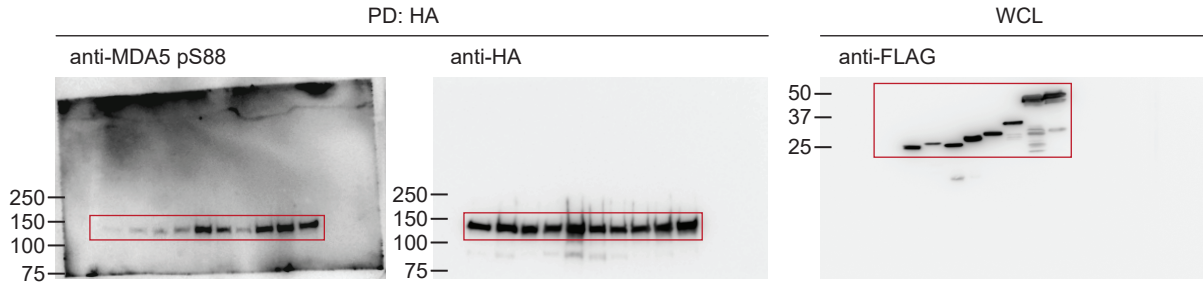

Extended Data Fig. 3h:

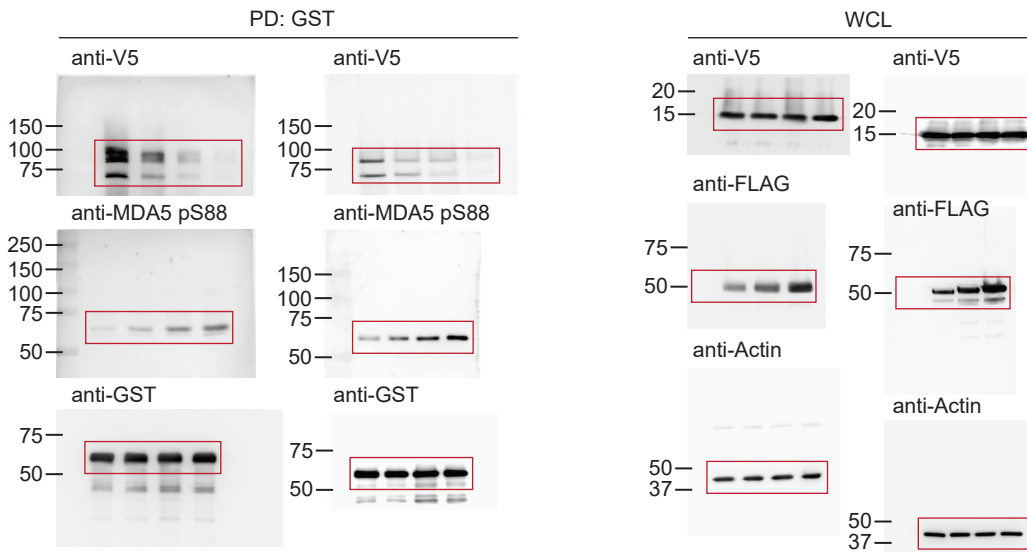

Supplement: NIHMS1681665-supplement-1681665_SourceData_ExtData_Fig3_Blot.pdf [file NIHMS1681665-supplement-1681665_SourceData_ExtData_Fig3_Blot.pdf]
