# Supplementary material
Source: PubMed Central journal article supplement (PMC8103894)

**Extended Data Fig. 1a:**

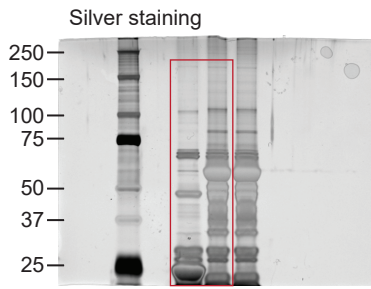

**Extended Data Fig. 1b:**

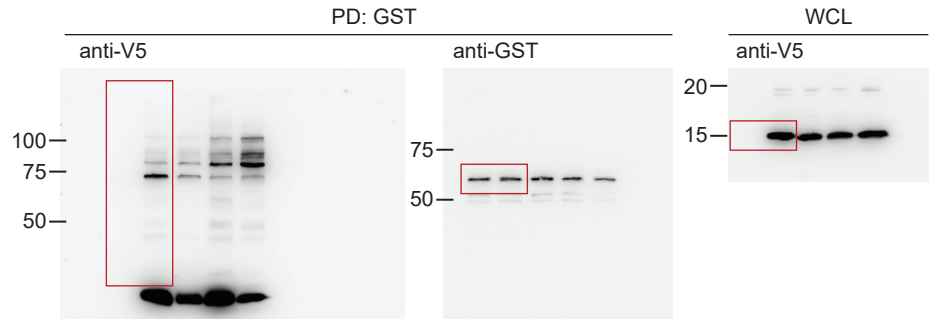

Supplement: NIHMS1681665-supplement-1681665_SourceData_ExtData_Fig1_Blot.pdf [file NIHMS1681665-supplement-1681665_SourceData_ExtData_Fig1_Blot.pdf]

**Extended Data Fig. 4a:**

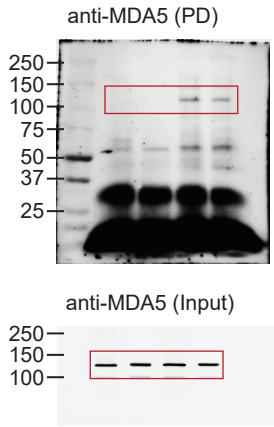

**Extended Data Fig. 4b:**

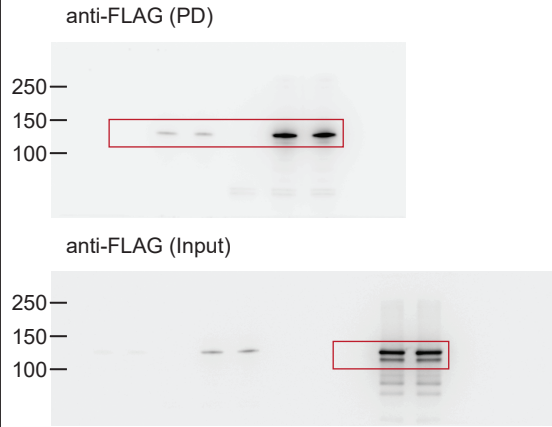

**Extended Data Fig. 4c:**

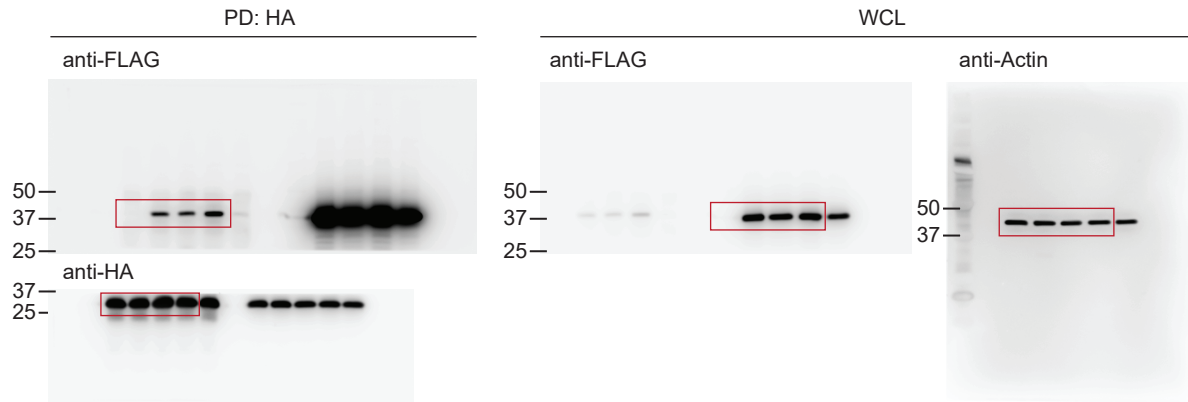

**Extended Data Fig. 4d:**

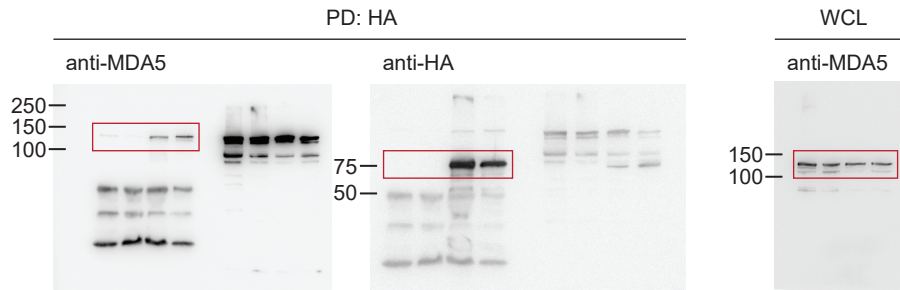

Supplement: NIHMS1681665-supplement-1681665_SourceData_ExtData_Fig4.pdf [file NIHMS1681665-supplement-1681665_SourceData_ExtData_Fig4.pdf]

**Extended Data Fig. 5b:**

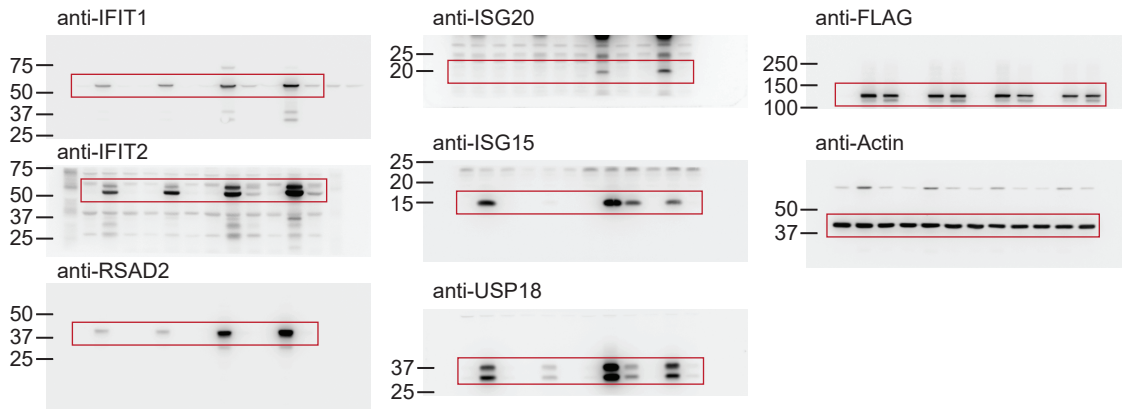

**Extended Data Fig. 5d:**

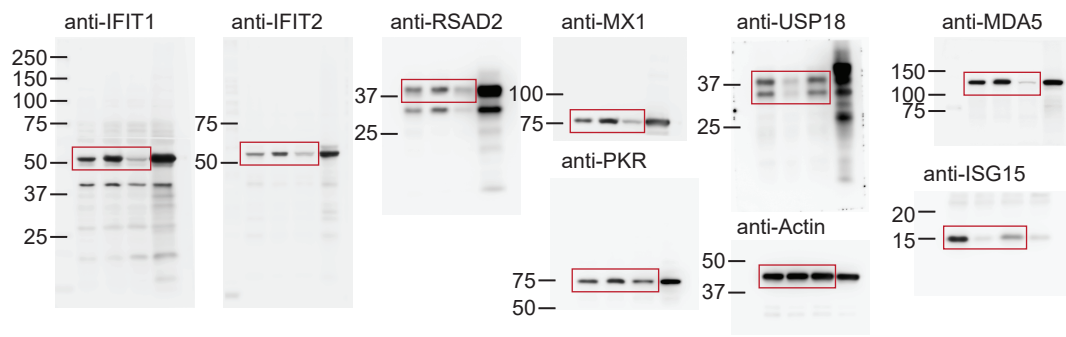

Supplement: NIHMS1681665-supplement-1681665_SourceData_ExtData_Fig5_Blot.pdf [file NIHMS1681665-supplement-1681665_SourceData_ExtData_Fig5_Blot.pdf]

Extended Data Fig. 6a:

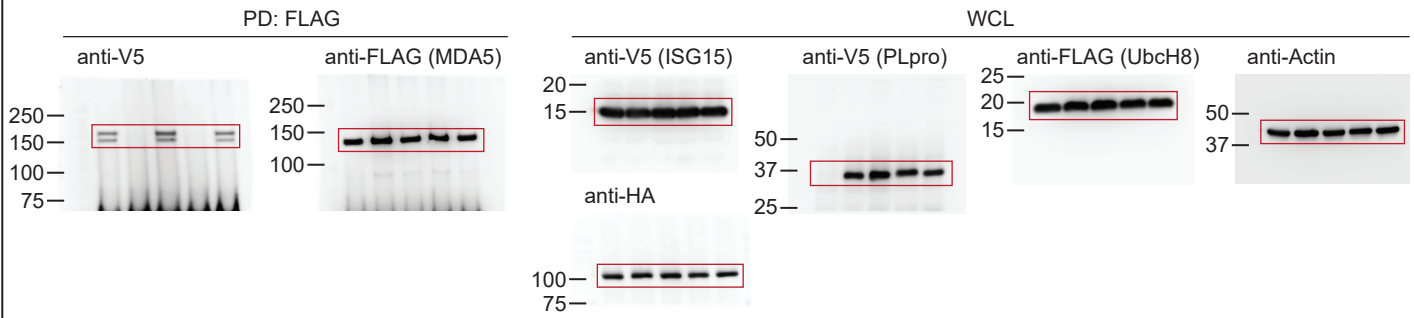

Extended Data Fig. 6b:

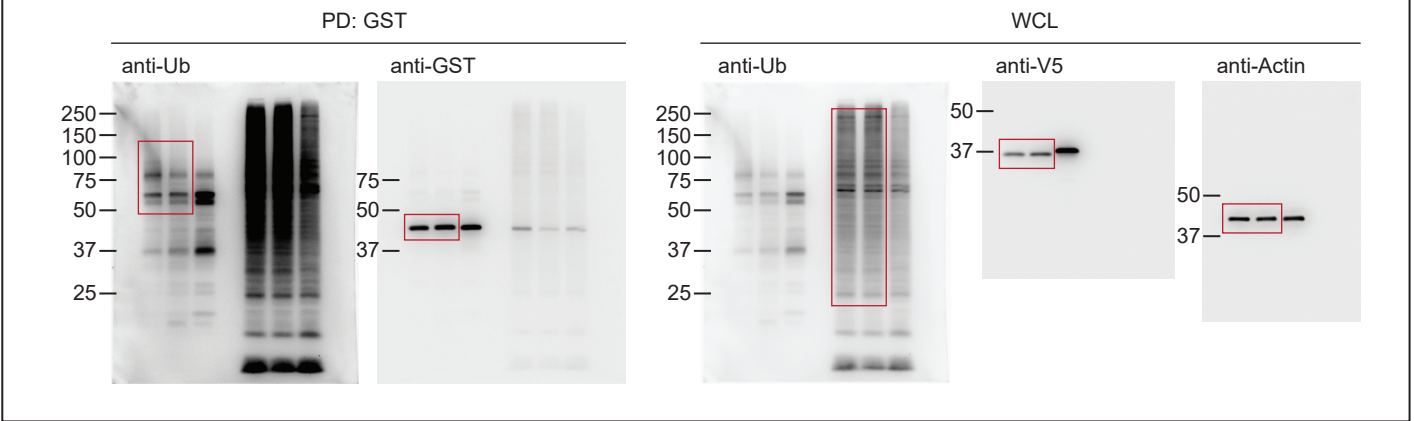

Extended Data Fig. 6c:

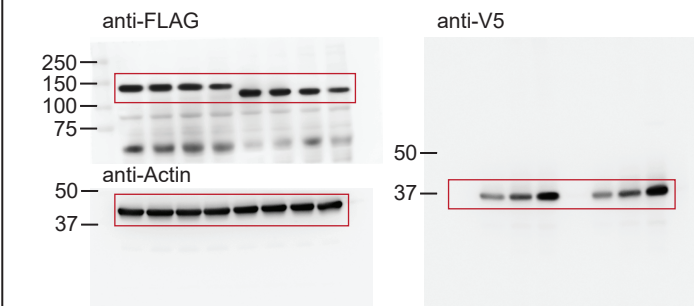

Supplement: NIHMS1681665-supplement-1681665_SourceData_ExtData_Fig6_Blot.pdf [file NIHMS1681665-supplement-1681665_SourceData_ExtData_Fig6_Blot.pdf]

**Figure 1a:**

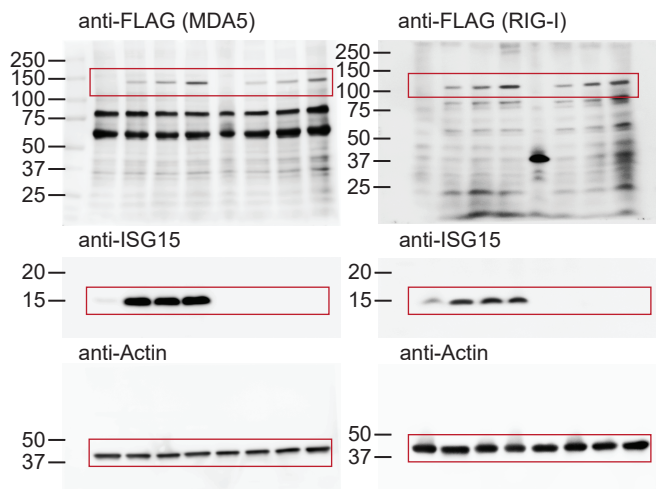

**Figure 1b:**

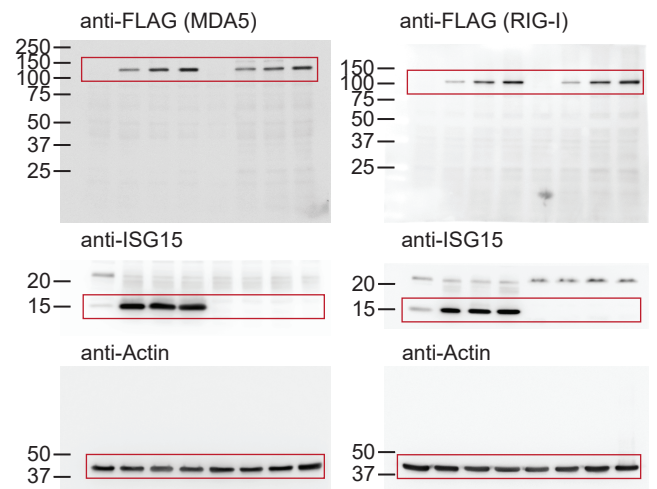

**Figure 1c:**

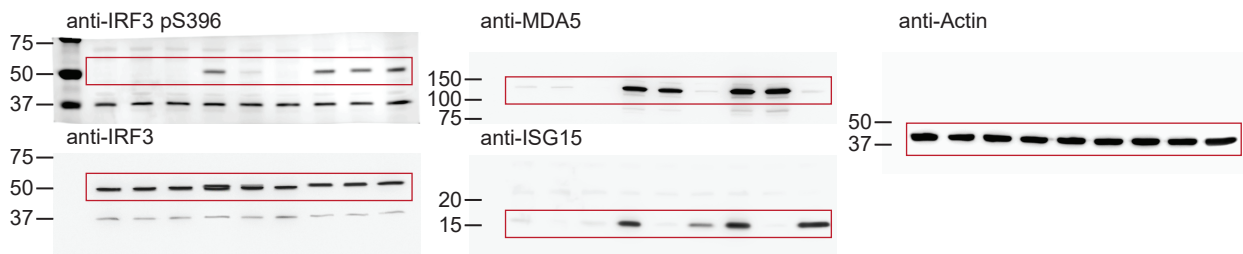

Supplement: NIHMS1681665-supplement-1681665_SourceData_Fig1_Blot.pdf [file NIHMS1681665-supplement-1681665_SourceData_Fig1_Blot.pdf]

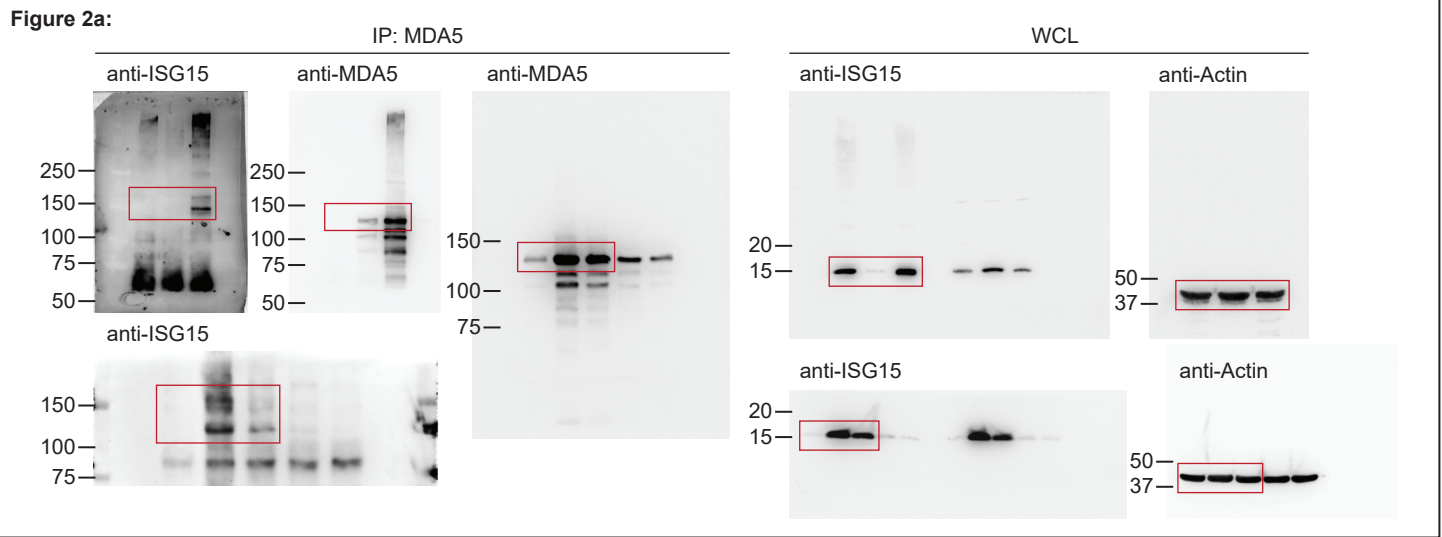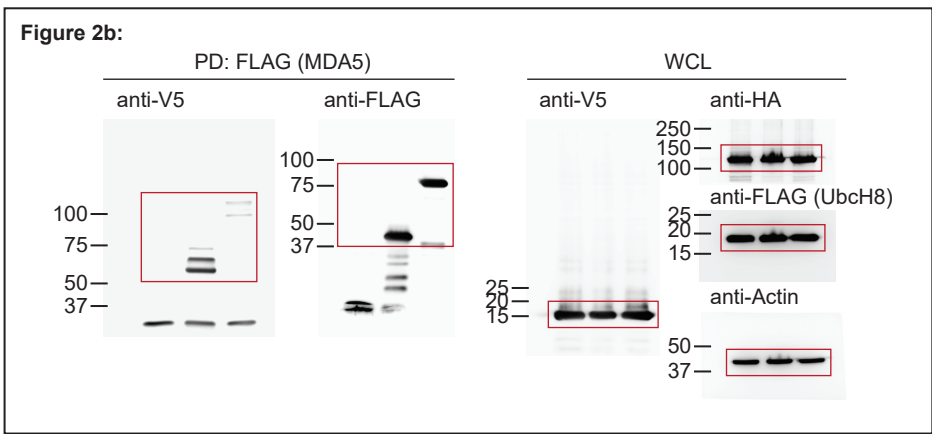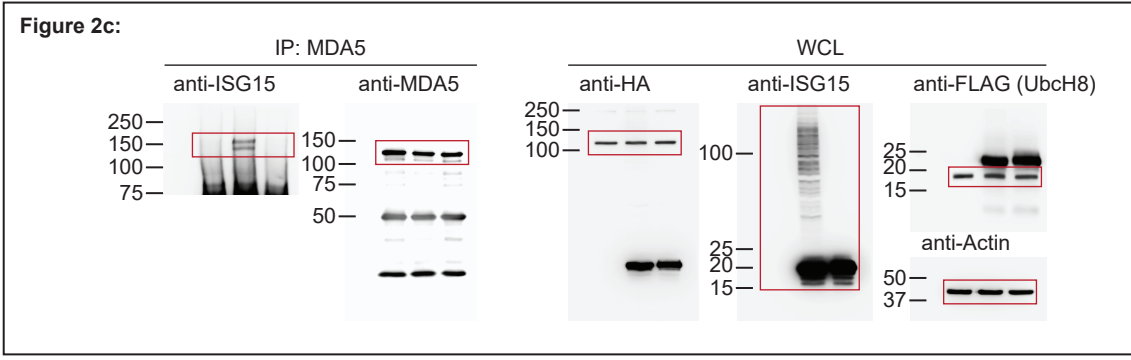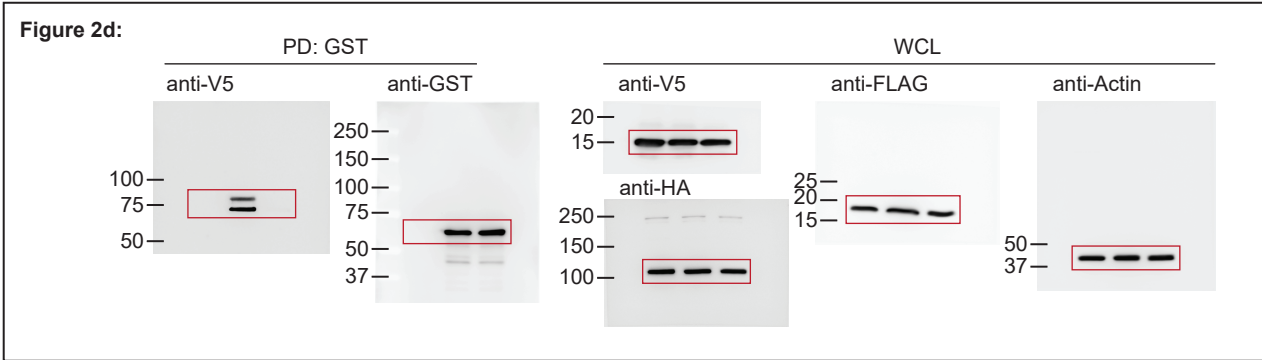

**Figure 2e:**

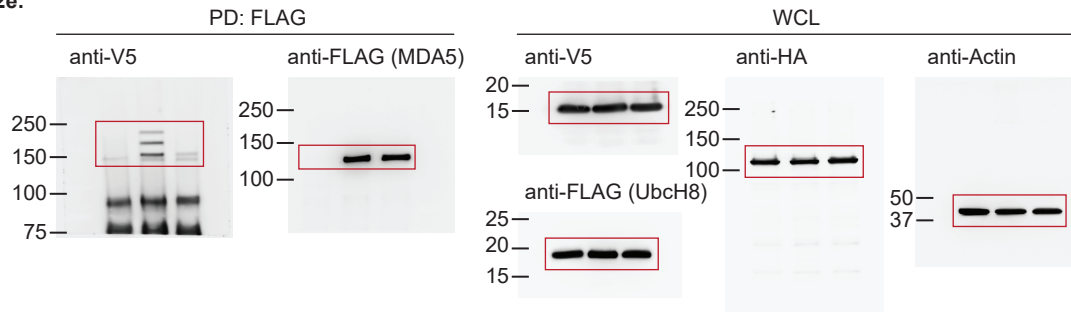

**Figure 2f:**

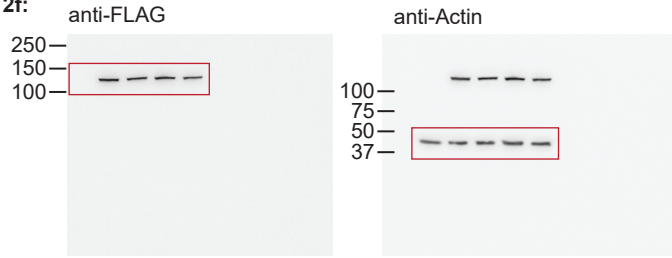

**Figure 2h:**

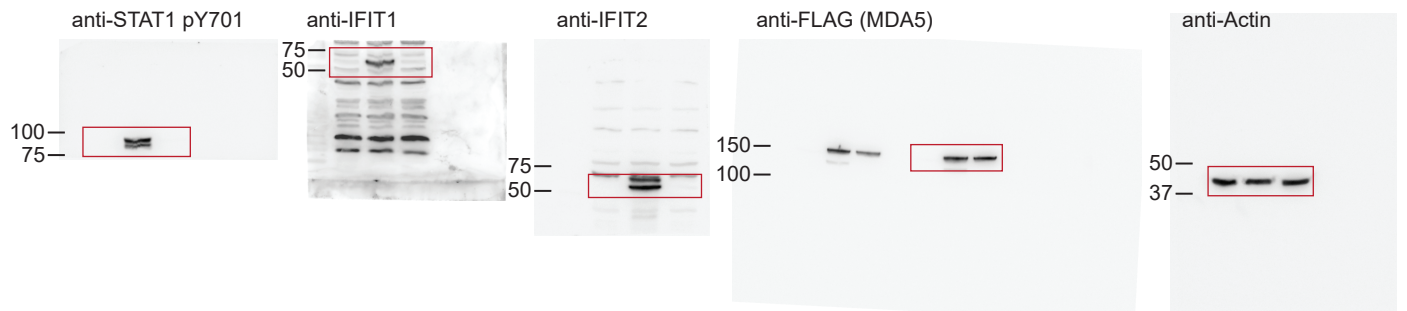

Supplement: NIHMS1681665-supplement-1681665_SourceData_Fig2_Blot.pdf [file NIHMS1681665-supplement-1681665_SourceData_Fig2_Blot.pdf]

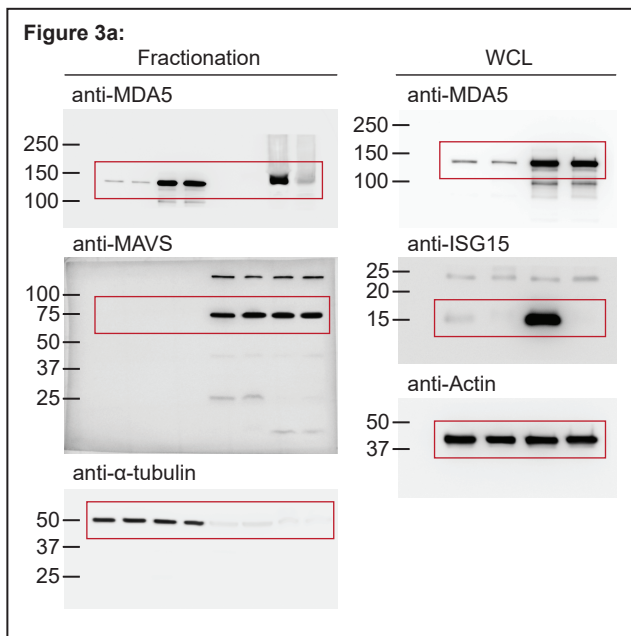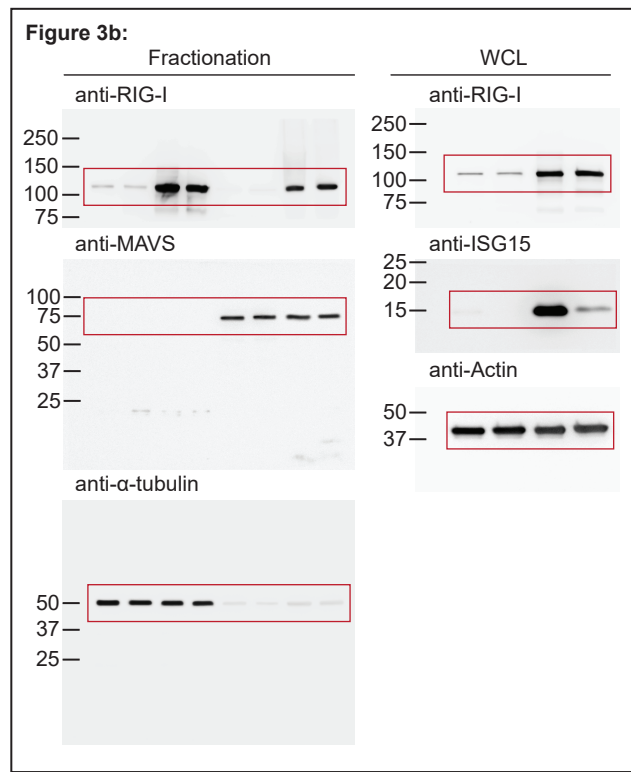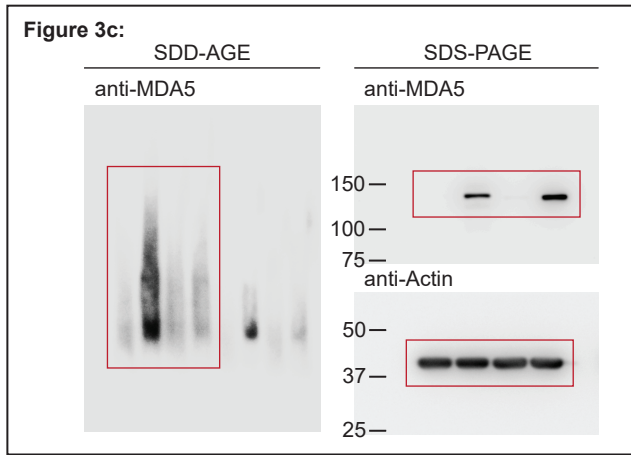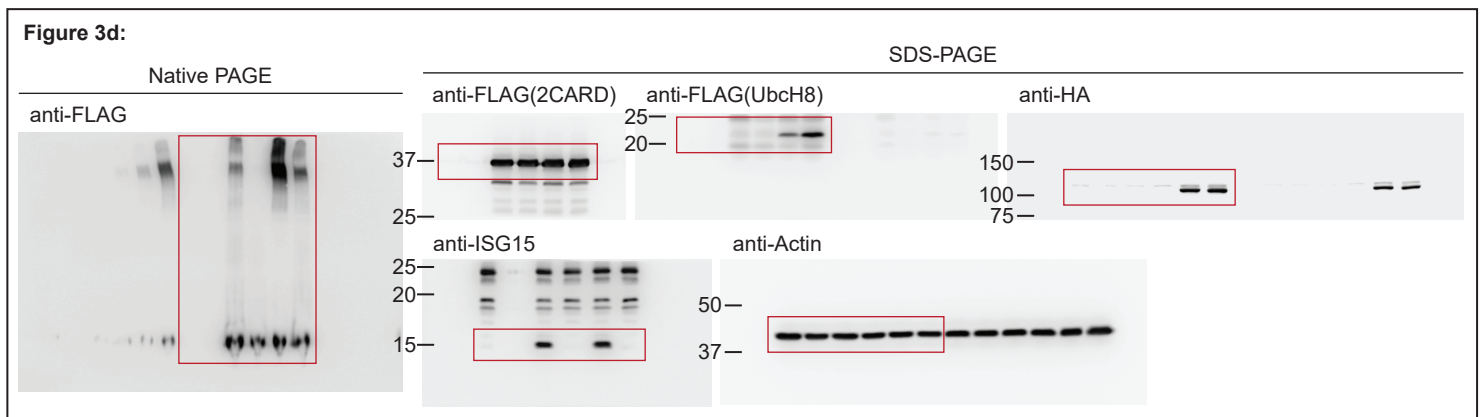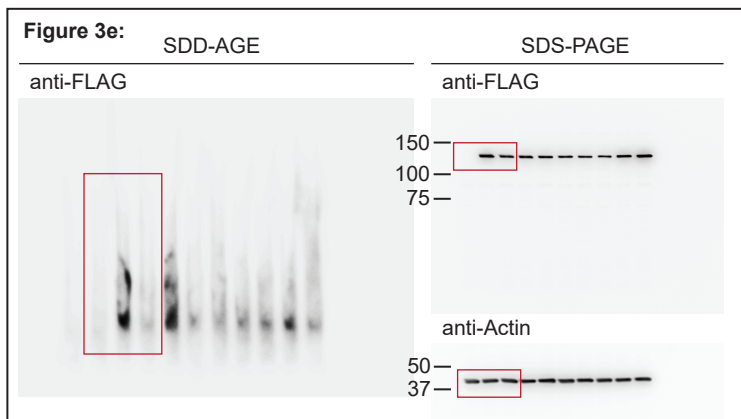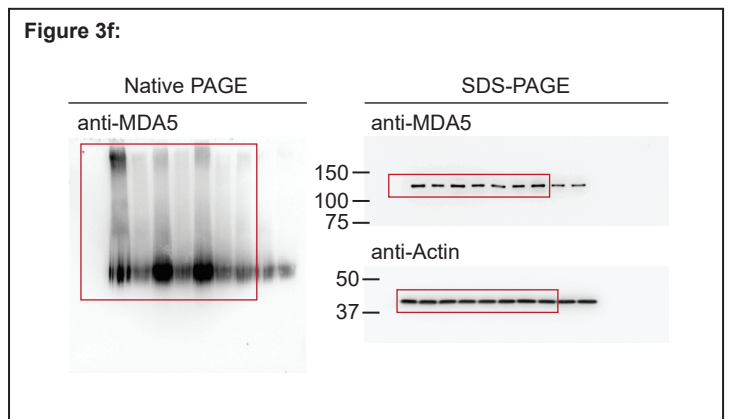

Supplement: NIHMS1681665-supplement-1681665_SourceData_Fig3_Blot.pdf [file NIHMS1681665-supplement-1681665_SourceData_Fig3_Blot.pdf]

Figure 5b:

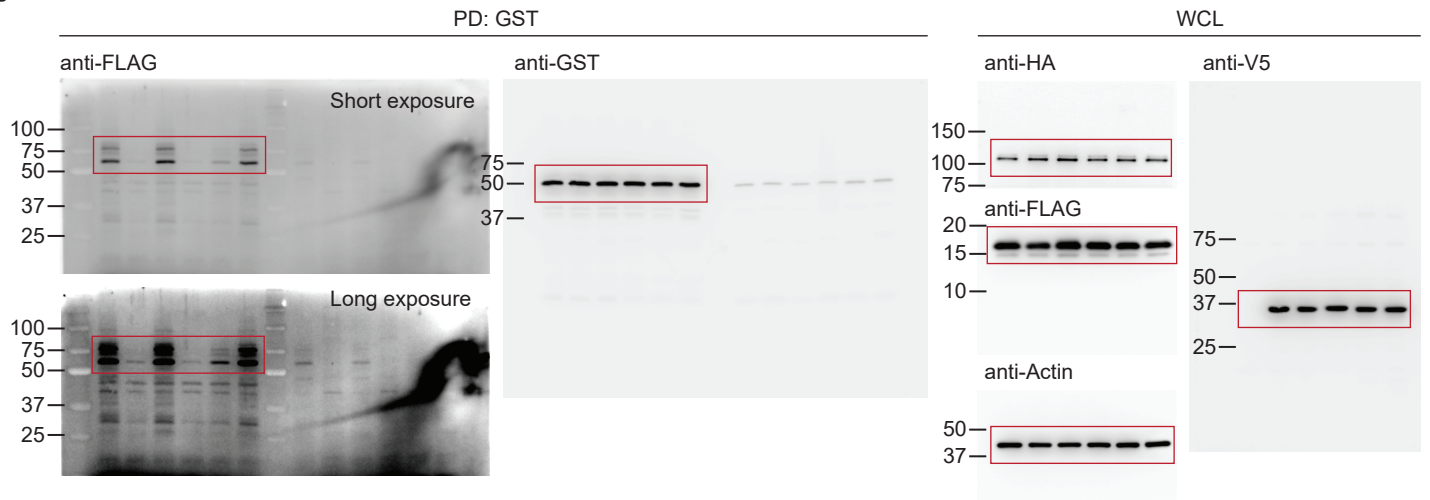

Figure 5c:

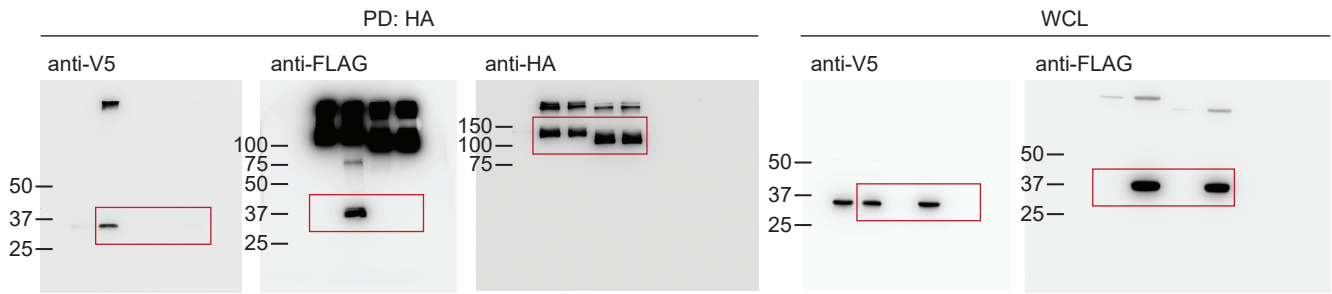

Figure 5d:

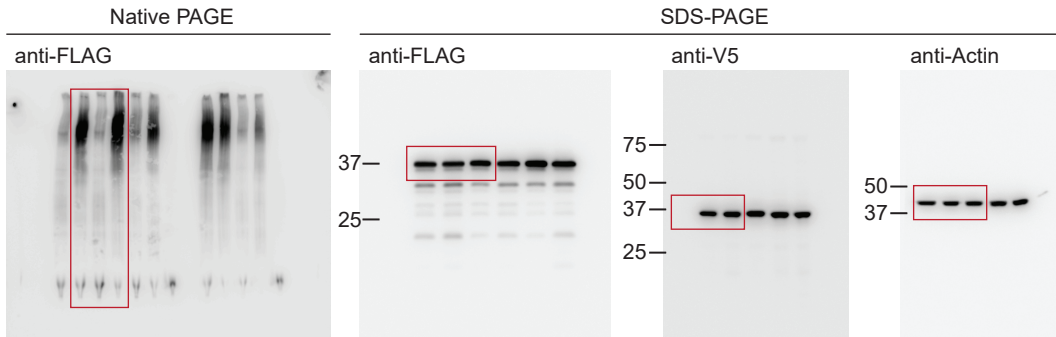

Figure 5e:

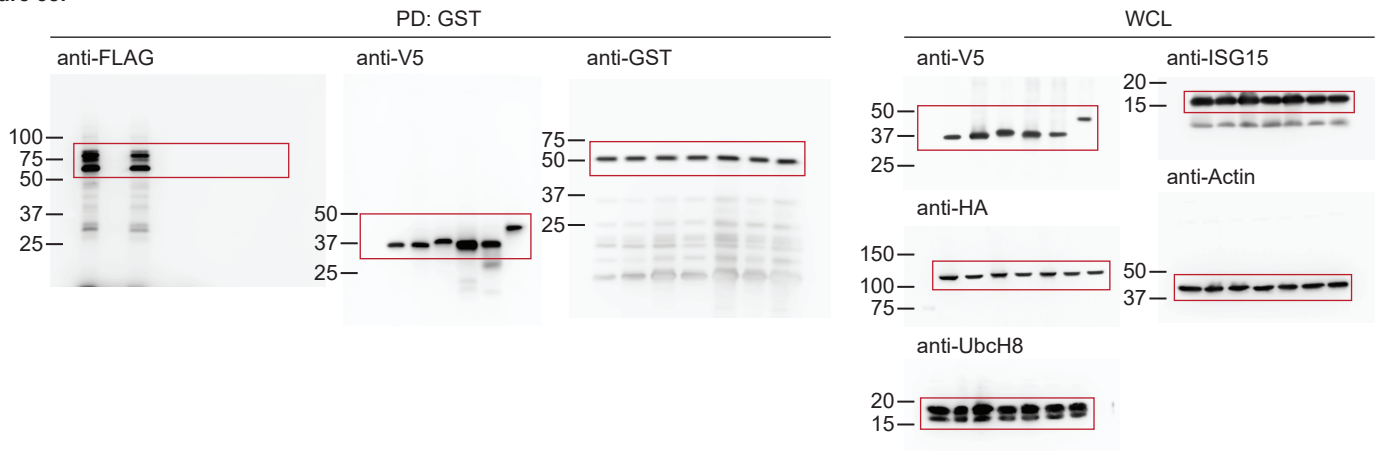

Supplement: NIHMS1681665-supplement-1681665_SourceData_Fig5.pdf [file NIHMS1681665-supplement-1681665_SourceData_Fig5.pdf]

**Figure 6b:**

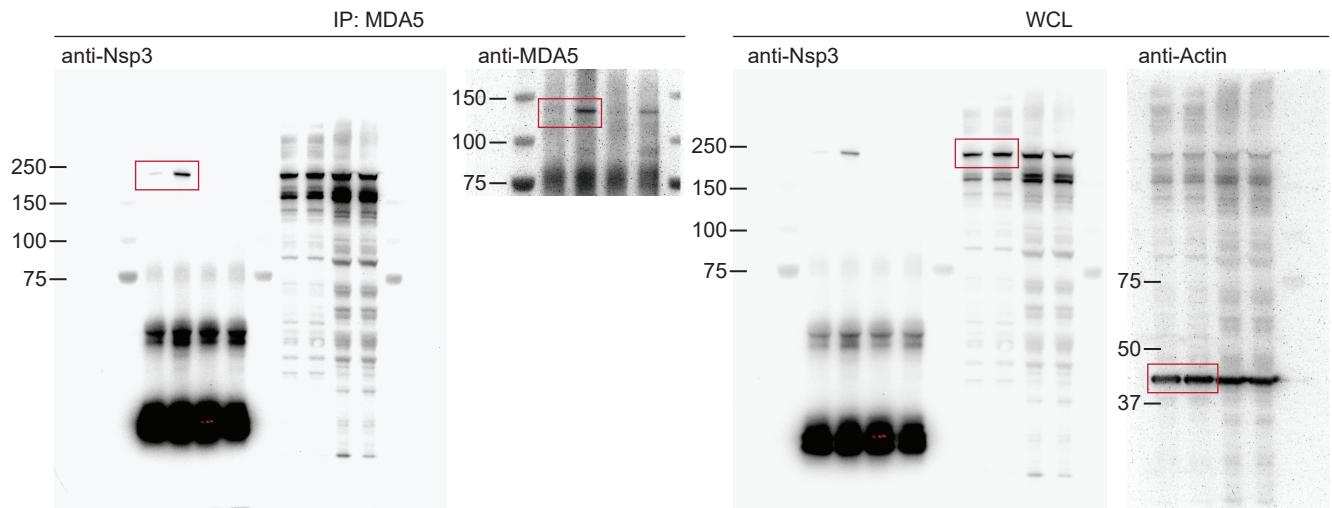

**Figure 6c:**

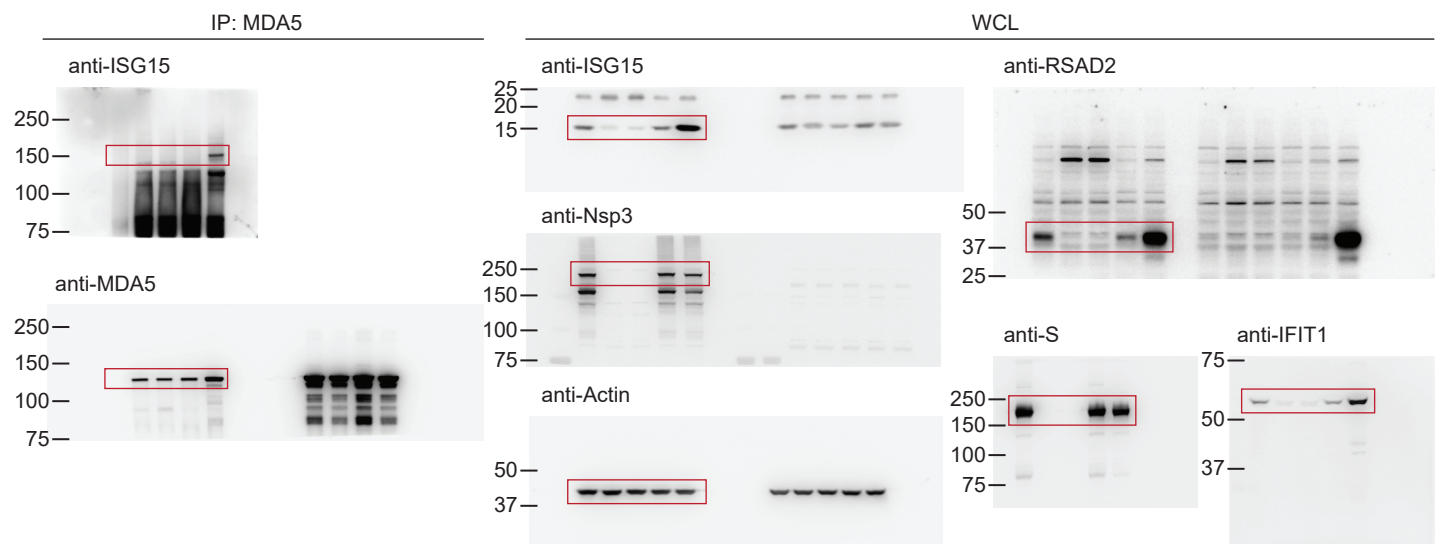

**Figure 6f:**

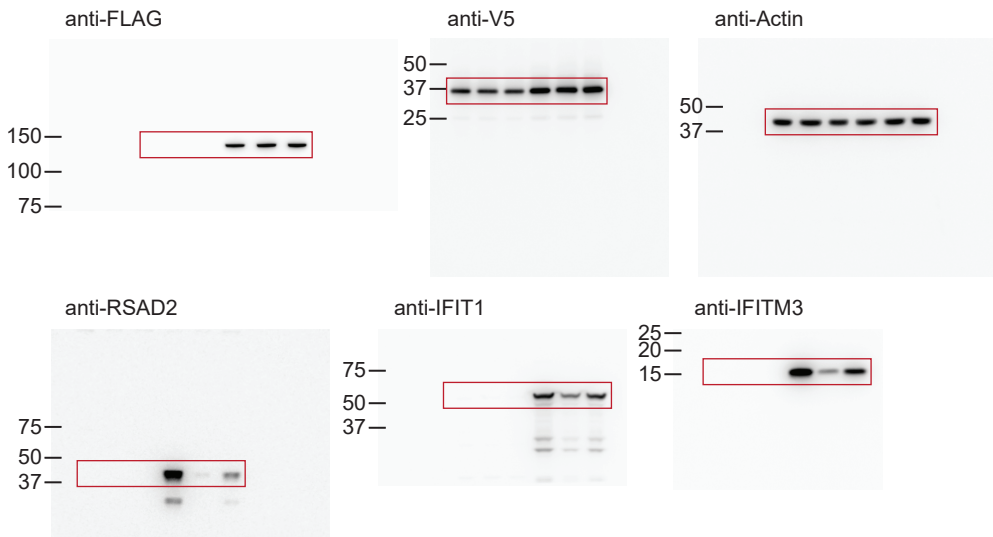

Supplement: NIHMS1681665-supplement-1681665_SourceData_Fig6_Blot.pdf [file NIHMS1681665-supplement-1681665_SourceData_Fig6_Blot.pdf]
